# Supplementary material for: Synergistic Effects of Hybrid Carbonaceous Fillers of Carbon Fibers and Reduced Graphene Oxides on Enhanced Heat-Dissipation Capability of Polymer Composites
Source: PubMed Central journal article supplement (PMC7240675; doi:10.3390/polym12040909), 2020-04-14
Supplement: polymers-12-00909-s001.pdf [file polymers-12-00909-s001.pdf]

## Supplementary Data

Article

# Synergistic Effects of Hybrid Carbonaceous Fillers of Carbon Fibers and Reduced Graphene Oxides on Enhanced Heat-Dissipation Capability of Polymer Composites

Yun Seon Lee<sup>1,2</sup>, Jaesang Yu<sup>1</sup>, Sang Eun Shim<sup>2\*</sup> and Cheol-Min Yang<sup>1\*</sup>

<sup>1</sup> Institute of Advanced Composite Materials, Korea Institute of Science and Technology (KIST), 92 Chudong-ro, Wanju-gun, Jeonbuk 55324, Republic of Korea; t14225@kist.re.kr (Y.S.L.); jamesyu@kist.re.kr (J.Y.)

<sup>2</sup> Department of Chemical Engineering, Inha University, 100 Inha-ro, Nam-gu, Incheon 22212, Republic of Korea

\* Correspondence: seshim@inha.ac.kr (S.E.S.); cmyang1119@kist.re.kr (C.-M.Y.)

**Table S1.** Summary of basic properties of carbonaceous fillers.

| Material                                    | Mesophase Pitch-Based Carbon Fiber (MPCF) |                                                 |                                       | Reduced Graphene Oxide (rGO)                         | Multi-Walled Carbon Nanotube (MWCNT) |
|---------------------------------------------|-------------------------------------------|-------------------------------------------------|---------------------------------------|------------------------------------------------------|--------------------------------------|
|                                             | K223HE                                    | K223HM                                          |                                       |                                                      |                                      |
| Model                                       | K223HE                                    | K223HM                                          |                                       | V50                                                  | US4315                               |
| Physical size                               | 6 mm<br>(length of fiber)                 | 200 $\mu\text{m}$<br>(length of fiber)          | 50 $\mu\text{m}$<br>(length of fiber) | 1.0 ~ 1.4 nm<br>(average through-plane dimension)    | 50 ~ 80 nm<br>(outside diameter)     |
|                                             |                                           | 11 $\mu\text{m}$<br>(diameter of mono-filament) |                                       | $\geq 20 \mu\text{m}$<br>(average lateral dimension) | 10 ~ 20 $\mu\text{m}$<br>(length)    |
| Carbon content                              | $\geq 99 \%$                              |                                                 |                                       | 76 ~ 82 %                                            | 97 %                                 |
| Thermal conductivity                        | 550 W/mK<br>(fiber axial direction)       |                                                 |                                       | -                                                    | -                                    |
| Electrical conductivity (powder resistance) | 959 S/cm                                  | 845 S/cm                                        | 724 S/cm                              | 2.88 S/cm                                            | -                                    |
| $I_D/I_G$ ratio (Raman)                     | 0.15                                      | 0.24                                            | 0.36                                  | 2.88                                                 | -                                    |
| Specific surface area                       | -                                         |                                                 |                                       | 500 ~ 780 $\text{m}^2/\text{g}$                      | 40 $\text{m}^2/\text{g}$             |

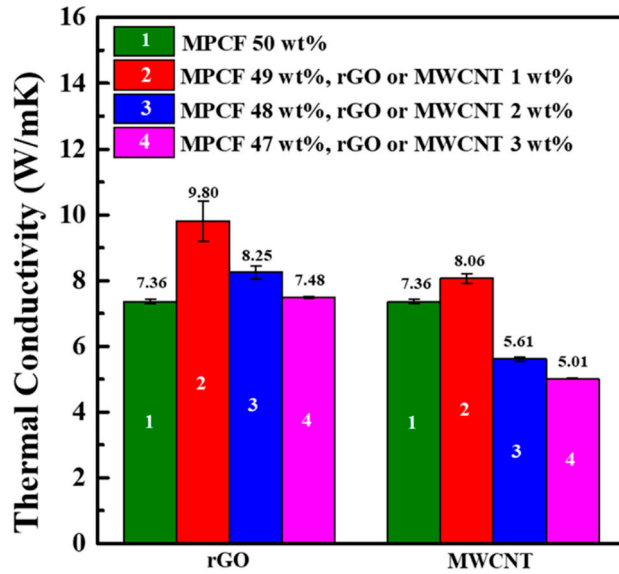

**Figure S1.** In-plane thermal conductivity values of epoxy-based composites containing MPCF-rGO and MPCF-MWCNT hybrid fillers (MPCF length of 50  $\mu\text{m}$  and different rGO or MWCNT contents of 0 to 3 wt%).

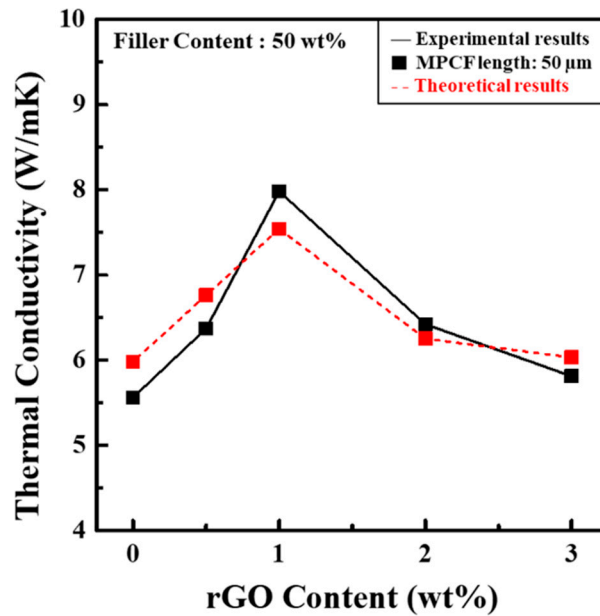

**Figure S2.** Experimental and theoretical thermal conductivity values of epoxy-based composites containing MPCF-rGO hybrid fillers of MPCF length of 50  $\mu\text{m}$  and different rGO contents (MPCF:rGO weight ratios of 50:0, 49.5:0.5, 49:1, 48:2, and 47:3).
